# Supplementary material for: Randomized, Double-Blind, Crossover Trial of Amitriptyline for Analgesia in Painful HIV-Associated Sensory Neuropathy
Source: PubMed Central journal article supplement (PMC4431817; doi:10.1371/journal.pone.0126297), 2015-05-14

**S1 Data. Frequency distribution of amitriptyline tablets taken per day, and the relationship between dose of amitriptyline and pain relief (per protocol cohort: n = 122)**

**Frequency distribution of amitriptyline tablets per day at the maximum titration dose**

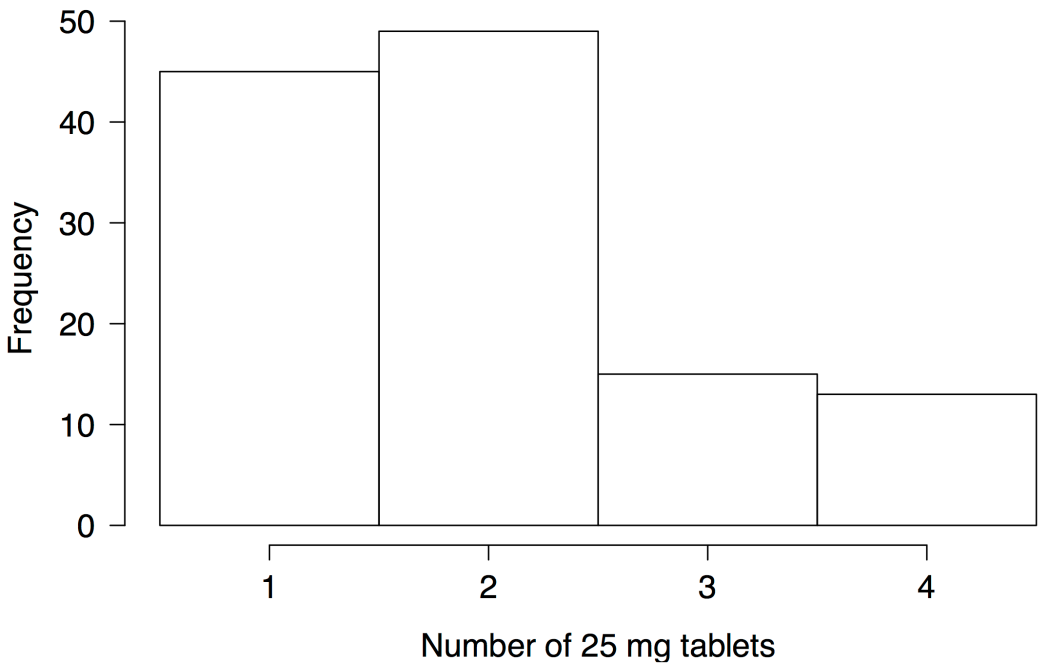

### Plots of maximum titration dose of amitriptyline versus change in pain intensity over six weeks of treatment

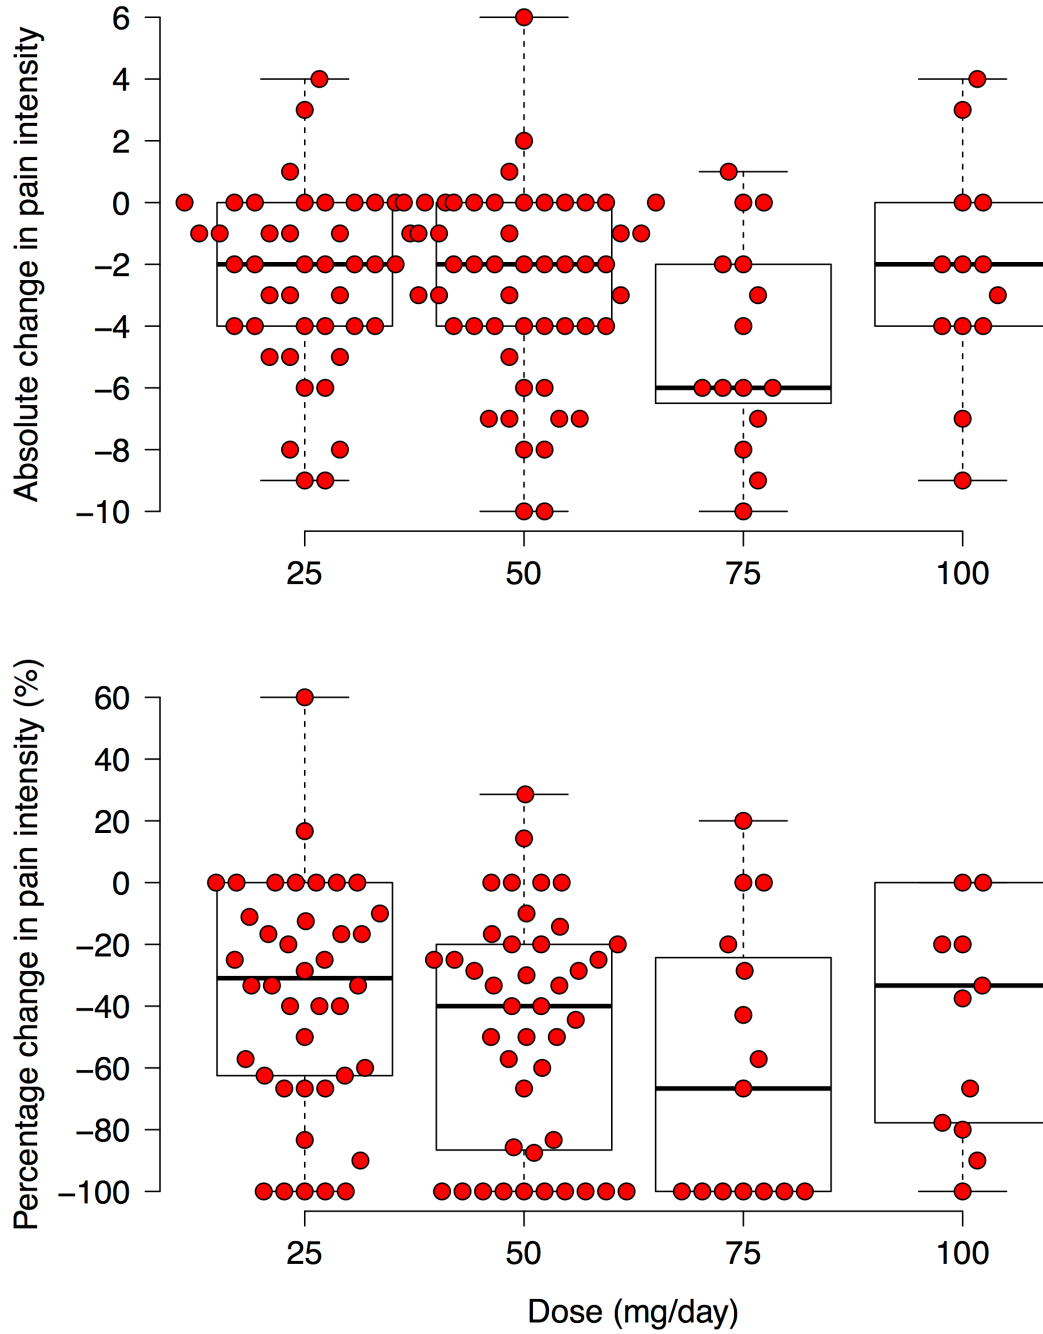

Supplement: pone.0126297.s002.pdf [file pone.0126297.s002.pdf]
