# Supplementary material for: Randomized, Double-Blind, Crossover Trial of Amitriptyline for Analgesia in Painful HIV-Associated Sensory Neuropathy
Source: PubMed Central journal article supplement (PMC4431817; doi:10.1371/journal.pone.0126297), 2015-05-14
Supplement: pone.0126297.s003.pdf [file pone.0126297.s003.pdf]

## **S2 Data. Characteristics of responders in ARV users (per protocol cohort: n = 61)**

Responders were defined as those participants with a change in pain score (between baseline and week six of intervention) of two or more points on the 11-point NRS when administered amitriptyline compared to when they were administered placebo.

Number of responders = 26 (42%)

### **Dose of amitriptyline**

|               | Median (IQR) dose in mg |
|---------------|-------------------------|
| Non-responder | 50 (25 - 50)            |
| Responder     | 50 (25 - 75)            |

Wilcoxon rank sum test: Dose by Responder  
W = 369, p-value = 0.18

### **Order of interventions**

**(AP: Amitriptyline then Placebo, PA: Placebo then Amitriptyline)**

|               | Order |    |
|---------------|-------|----|
|               | AP    | PA |
| Non-responder | 17    | 18 |
| Responder     | 12    | 14 |

Fisher's Exact Test: Responder and Order  
p-value = 1; Odds ratio (95% CI) = 1.1 (0.35 to 3.44)

### **Age**

|               | Mean (SD) age in years |
|---------------|------------------------|
| Non-responder | 41.0 (7.51)            |
| Responder     | 42.9 (7.28)            |

Welch Two Sample t-test: Age by Responder  
t = -1.00, df = 53, p-value = 0.32

### **Sex**

|               | Female |     |
|---------------|--------|-----|
|               | No     | Yes |
| Non-responder | 9      | 26  |
| Responder     | 7      | 19  |

Fisher's Exact Test: Responder and Female  
p-value = 1; Odds ratio (95% CI) = 0.9 (0.26 to 3.55)

## CD4 T-cell count

Median (IQR) CD4 T-cell count

|               |                  |
|---------------|------------------|
| Non-responder | 195 (125 to 260) |
| Responder     | 247 (123 to 321) |

Wilcoxon rank sum test: CD4 by Responder  
W = 371; p-value = 0.41

## Ever used stavudine (D4T: stavudine)

|               | D4T ever |     |
|---------------|----------|-----|
|               | No       | Yes |
| Non-responder | 11       | 24  |
| Responder     | 6        | 20  |

Fisher's Exact Test: Responder and D4T ever  
p-value = 0.596; Odds ratio (95% CI) = 1.5 (0.42 to 5.94)

## Employment

|               | Employed |     |
|---------------|----------|-----|
|               | No       | Yes |
| Non-responder | 1        | 34  |
| Responder     | 0        | 26  |

Fisher's Exact Test: Responder and Employed  
p-value = 1; Odds ratio (95%CI) = inf (0.02 to inf)

## Education (≥ 9 years of education)

|               | Education ≥ 9 years |     |
|---------------|---------------------|-----|
|               | No                  | Yes |
| Non-responder | 8                   | 24  |
| Responder     | 12                  | 14  |

Fisher's Exact Test: Responder and Education ≥ 9 years  
p-value = 0.106; Odds ratio (95%CI) = 0.4 (0.11 to 1.35)

## Symptoms: burning

|               | Burning |     |
|---------------|---------|-----|
|               | No      | Yes |
| Non-responder | 6       | 29  |
| Responder     | 6       | 20  |

Fisher's Exact Test: Responder and Burning  
p-value = 0.75; Odds ratio (95% CI) = 0.7 (0.16 to 3.01)

### Symptoms: painful cold

|               | Painful cold |     |
|---------------|--------------|-----|
|               | No           | Yes |
| Non-responder | 2            | 33  |
| Responder     | 3            | 23  |

Fisher's Exact Test: Responder and Painful cold  
p-value = 0.64; Odds ratio (95% CI) = 0.47 (0.04 to 4.45)

### Symptoms: electric shocks

|               | Electric shocks |     |
|---------------|-----------------|-----|
|               | No              | Yes |
| Non-responder | 11              | 24  |
| Responder     | 4               | 22  |

Fisher's Exact Test: Responder and Electric shocks  
p-value = 0.23; Odds ratio (95% CI) = 2.48 (0.62 to 12.30)

### Symptoms: tingling

|               | Tingling |     |
|---------------|----------|-----|
|               | No       | Yes |
| Non-responder | 4        | 31  |
| Responder     | 1        | 25  |

Fisher's Exact Test: Responder and Tingling  
p-value = 0.38; Odds ratio (95% CI) = 3.2 (0.29 to 164.96)

### Symptoms: pins and needles

|               | Pins and needles |     |
|---------------|------------------|-----|
|               | No               | Yes |
| Non-responder | 2                | 33  |
| Responder     | 1                | 25  |

Fisher's Exact Test: Responder and Pins and needles  
p-value = 1; Odds ratio (95% CI) = 1.5 (0.07 to 92.86)

### Symptoms: numbness

|               | Numbness |     |
|---------------|----------|-----|
|               | No       | Yes |
| Non-responder | 2        | 33  |
| Responder     | 1        | 25  |

Fisher's Exact Test: Responder and Numbness  
p-value = 1; Odds ratio (95% CI) = 1.5 (0.07 to 92.86)

**Symptoms: itching**

|               | Itching |     |
|---------------|---------|-----|
|               | No      | Yes |
| Non-responder | 6       | 29  |
| Responder     | 10      | 16  |

Fisher's Exact Test: Responder and Itching  
p-value = 0.1; Odds ratio (95% CI) = 0.3 (0.08 to 1.25)

**Signs: touch hypoaesthesia**

|               | Touch hypoaesthesia |     |
|---------------|---------------------|-----|
|               | No                  | Yes |
| Non-responder | 33                  | 2   |
| Responder     | 24                  | 2   |

Fisher's Exact Test: Responder and Touch hypoaesthesia  
p-value = 1; Odds ratio (95% CI) = 1.4 (0.09 to 20.11)

**Signs: pin-prick hypoaesthesia**

|               | Pin.prick.hypoaesthesia |     |
|---------------|-------------------------|-----|
|               | No                      | Yes |
| Non-responder | 11                      | 24  |
| Responder     | 15                      | 11  |

Fisher's Exact Test: Responder and Pin-prick hypoaesthesia  
p-value = 0.066; Odds ratio (95% CI) = 0.3 (0.10 to 1.09)

**Signs: brush allodynia**

|               | Brush allodynia |     |
|---------------|-----------------|-----|
|               | No              | Yes |
| Non-responder | 25              | 10  |
| Responder     | 20              | 6   |

Fisher's Exact Test: Responder and Brush.allodynia  
p-value = 0.77; Odds ratio (95% CI) = 0.8 (0.19 to 2.77)
