# Supplementary material for: Randomized, Double-Blind, Crossover Trial of Amitriptyline for Analgesia in Painful HIV-Associated Sensory Neuropathy
Source: PubMed Central journal article supplement (PMC4431817; doi:10.1371/journal.pone.0126297), 2015-05-14
Supplement: pone.0126297.s004.pdf [file pone.0126297.s004.pdf]

**S3 Data. Characteristics of responders in ARV-naïve participants (per protocol cohort: n = 61)**

Responders were defined as those participants with a change in pain score (between baseline and week six of intervention) of two or more points on the 11-point NRS when administered amitriptyline compared to when they were administered placebo.

Number of responders = 26 (42%)

**Dose of amitriptyline**

|               | Median (IQR) dose in mg |
|---------------|-------------------------|
| Non-responder | 50 (25 - 50)            |
| Responder     | 50 (31.25 – 68.75)      |

Wilcoxon rank sum test: Dose by Responder  
W = 425, p-value = 0.55

**Order of interventions  
(AP: Amitriptyline then Placebo, PA: Placebo then Amitriptyline)**

|               | Order |    |
|---------------|-------|----|
|               | AP    | PA |
| Non-responder | 16    | 19 |
| Responder     | 11    | 15 |

Fisher's Exact Test: Responder and Order  
p-value = 1; Odds ratio (95% CI) = 1.1 (0.37 to 3.63)

**Age**

|               | Mean (SD) age in years |
|---------------|------------------------|
| Non-responder | 36.0 (9.27)            |
| Responders    | 31.7 (7.16)            |

Welch Two Sample t-test: Age by Responder  
t = 2.06, df = 58, p-value = 0.044

**Sex**

|               | Female |     |
|---------------|--------|-----|
|               | No     | Yes |
| Non-responder | 10     | 25  |
| Responder     | 9      | 17  |

Fisher's Exact Test: Responder and Female  
p-value = 0.78; Odds ratio (95% CI) = 0.8 (0.22 to 2.61)

## CD4 T-cell count

Median (IQR) CD4 T-cell count

|               |                  |
|---------------|------------------|
| Non-responder | 450 (350 to 615) |
| Responder     | 435 (317 to 569) |

Wilcoxon rank sum test: CD4 by Responder  
W = 431.5; p-value = 0.52

## Employment

|               | Employed |     |
|---------------|----------|-----|
|               | No       | Yes |
| Non-responder | 1        | 34  |
| Responder     | 3        | 23  |

Fisher's Exact Test: Responder and Employed  
p-value = 0.30; Odds ratio (95% CI) = 0.2 (0.004 to 3.08)

## Education (≥ 9 years of education)

|               | Education ≥ 9 years |     |
|---------------|---------------------|-----|
|               | No                  | Yes |
| Non-responder | 4                   | 30  |
| Responder     | 3                   | 22  |

Fisher's Exact Test: Responder and Education ≥ 9 years  
p-value = 1; Odds ratio (95% CI) = 1.0 (0.15 to 7.36)

## Symptoms: burning

|               | Burning |     |
|---------------|---------|-----|
|               | No      | Yes |
| Non-responder | 7       | 28  |
| Responder     | 7       | 19  |

Fisher's Exact Test: Responder and Burning  
p-value = 0.55; Odds ratio (95% CI) = 0.7 (0.17 to 2.69)

## Symptom: painful cold

|               | Painful cold |     |
|---------------|--------------|-----|
|               | No           | Yes |
| Non-responder | 10           | 25  |
| Responder     | 5            | 21  |

Fisher's Exact Test: Responder and Painful cold  
p-value = 0.55; Odds ratio (95% CI) = 1.7 (0.43 to 7.24)

### Symptom: electric shocks

|               | Electric shocks |     |
|---------------|-----------------|-----|
|               | No              | Yes |
| Non-responder | 8               | 27  |
| Responder     | 6               | 20  |

Fisher's Exact Test: Responder and Electric shocks  
p-value = 1; Odds ratio (95% CI) = 0.9 (0.25 to 4.05)

### Symptom: tingling

|               | Tingling |     |
|---------------|----------|-----|
|               | No       | Yes |
| Non-responder | 2        | 33  |
| Responder     | 2        | 24  |

Fisher's Exact Test: Responder and Tingling  
p-value = 1; Odds ratio (95% CI) = 0.7 (0.05 to 10.75)

### Symptom: pins and needles

|               | Pins and needles |     |
|---------------|------------------|-----|
|               | No               | Yes |
| Non-responder | 3                | 32  |
| Responder     | 0                | 26  |

Fisher's Exact Test: Responder and Pins and needles  
p-value = 0.25; ; Odds ratio (95% CI) = inf (0.31 to inf)

### Symptoms: numbness

|               | Numbness |     |
|---------------|----------|-----|
|               | No       | Yes |
| Non-responder | 3        | 32  |
| Responder     | 3        | 23  |

Fisher's Exact Test: Responder and Numbness  
p-value = 1; Odds ratio (95% CI) = 0.7 (0.09 to 5.89)

### Symptoms: itching

|               | Itching |     |
|---------------|---------|-----|
|               | No      | Yes |
| Non-responder | 13      | 22  |
| Responder     | 4       | 22  |

Fisher's Exact Test: Responder and Itching  
p-value = 0.08; Odds ratio (95% CI) = 3.2 (0.82 to 15.57)

**Signs: touch hypoesthesia**

|               | Touch.hypoesthesia |     |
|---------------|--------------------|-----|
|               | No                 | Yes |
| Non-responder | 33                 | 2   |
| Responder     | 25                 | 1   |

Fisher's Exact Test: Responder and Touch hypoesthesia  
p-value = 1; Odds ratio (95% CI) = 0.7 (0.01 to 13.44)

**Signs: pin-prick hypoesthesia**

|               | Pin-prick hypoesthesia |     |
|---------------|------------------------|-----|
|               | No                     | Yes |
| Non-responder | 18                     | 17  |
| Responder     | 10                     | 16  |

Fisher's Exact Test: Responder and Pin-prick hypoesthesia  
p-value = 0.44; Odds ratio (95% CI) = 1.7 (0.54 to 5.42)

**Signs: brush allodynia**

|               | Brush.allodynia |     |
|---------------|-----------------|-----|
|               | No              | Yes |
| Non-responder | 26              | 9   |
| Responder     | 19              | 7   |

Fisher's Exact Test: Responder and Brush allodynia  
p-value = 1; Odds ratio (95% CI) = 1.1 (0.28 to 3.89)
