# Supplementary material for: Randomized, Double-Blind, Crossover Trial of Amitriptyline for Analgesia in Painful HIV-Associated Sensory Neuropathy
Source: PubMed Central journal article supplement (PMC4431817; doi:10.1371/journal.pone.0126297), 2015-05-14

**S4 Data. ANOVA summary and data plot for “average pain in the last 3 days” in ARV-users (intention-to-treat cohort: n = 62)**

**Between group**

|       | Df | Sum Sq | Mean Sq | F value | Pr(>F) |
|-------|----|--------|---------|---------|--------|
| Order | 1  | 1.0    | 0.998   | 0.071   | 0.79   |

**Within group**

|           | Df | Sum Sq | Mean Sq | F value | Pr(>F)       |
|-----------|----|--------|---------|---------|--------------|
| Period    | 1  | 68.0   | 67.95   | 31.530  | 5.02e-08 *** |
| Time      | 2  | 56.1   | 28.04   | 13.011  | 4.11e-06 *** |
| Treatment | 1  | 0.3    | 0.29    | 0.136   | 0.712        |

Significance codes: '\*\*\*' 0.001, '\*\*' 0.01, '\*' 0.05

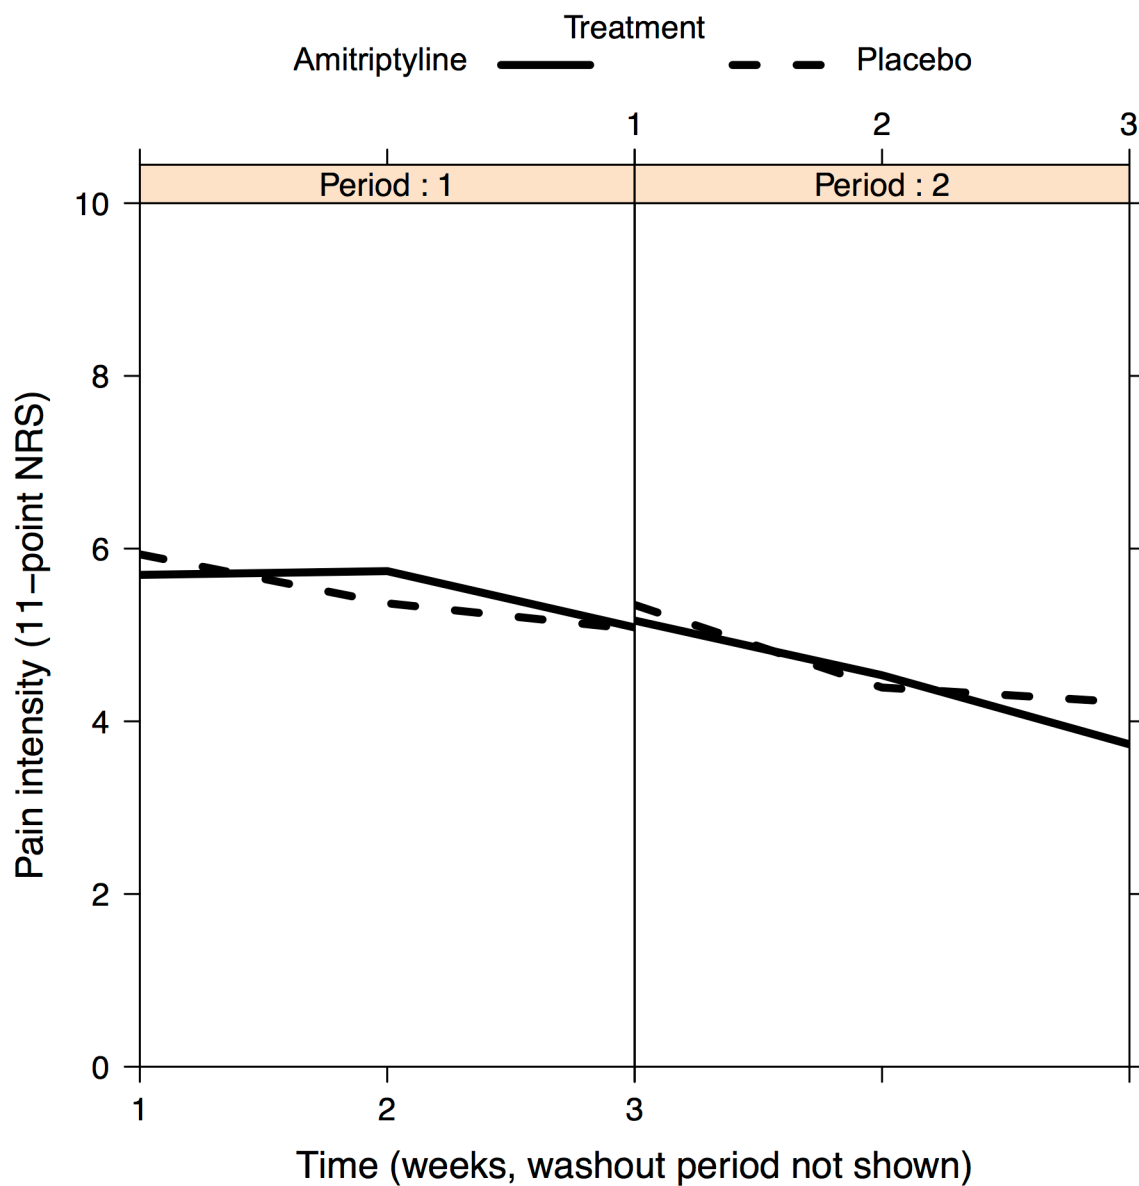

Supplement: pone.0126297.s005.pdf [file pone.0126297.s005.pdf]
