# Supplementary material for: Randomized, Double-Blind, Crossover Trial of Amitriptyline for Analgesia in Painful HIV-Associated Sensory Neuropathy
Source: PubMed Central journal article supplement (PMC4431817; doi:10.1371/journal.pone.0126297), 2015-05-14

**S5 Data. ANOVA summary and data plot for “average pain in the last 3 days” in ARV-naïve participants (intention-to-treat cohort: n = 62)**

**Between group**

|              | Df | Sum Sq | Mean Sq | F value | Pr(>F) |
|--------------|----|--------|---------|---------|--------|
| <i>Order</i> | 1  | 8.7    | 8.698   | 0.954   | 0.333  |

**Within group**

|                  | Df | Sum Sq | Mean Sq | F value | Pr(>F)       |
|------------------|----|--------|---------|---------|--------------|
| <i>Period</i>    | 1  | 212.7  | 212.68  | 112.636 | < 2e-16 ***  |
| <i>Time</i>      | 2  | 138.2  | 69.12   | 36.608  | 5.88e-15 *** |
| <i>Treatment</i> | 1  | 0.9    | 0.89    | 0.471   | 0.493        |

Significance codes: '\*\*\*\*' 0.001, '\*\*\*' 0.01, '\*\*' 0.05

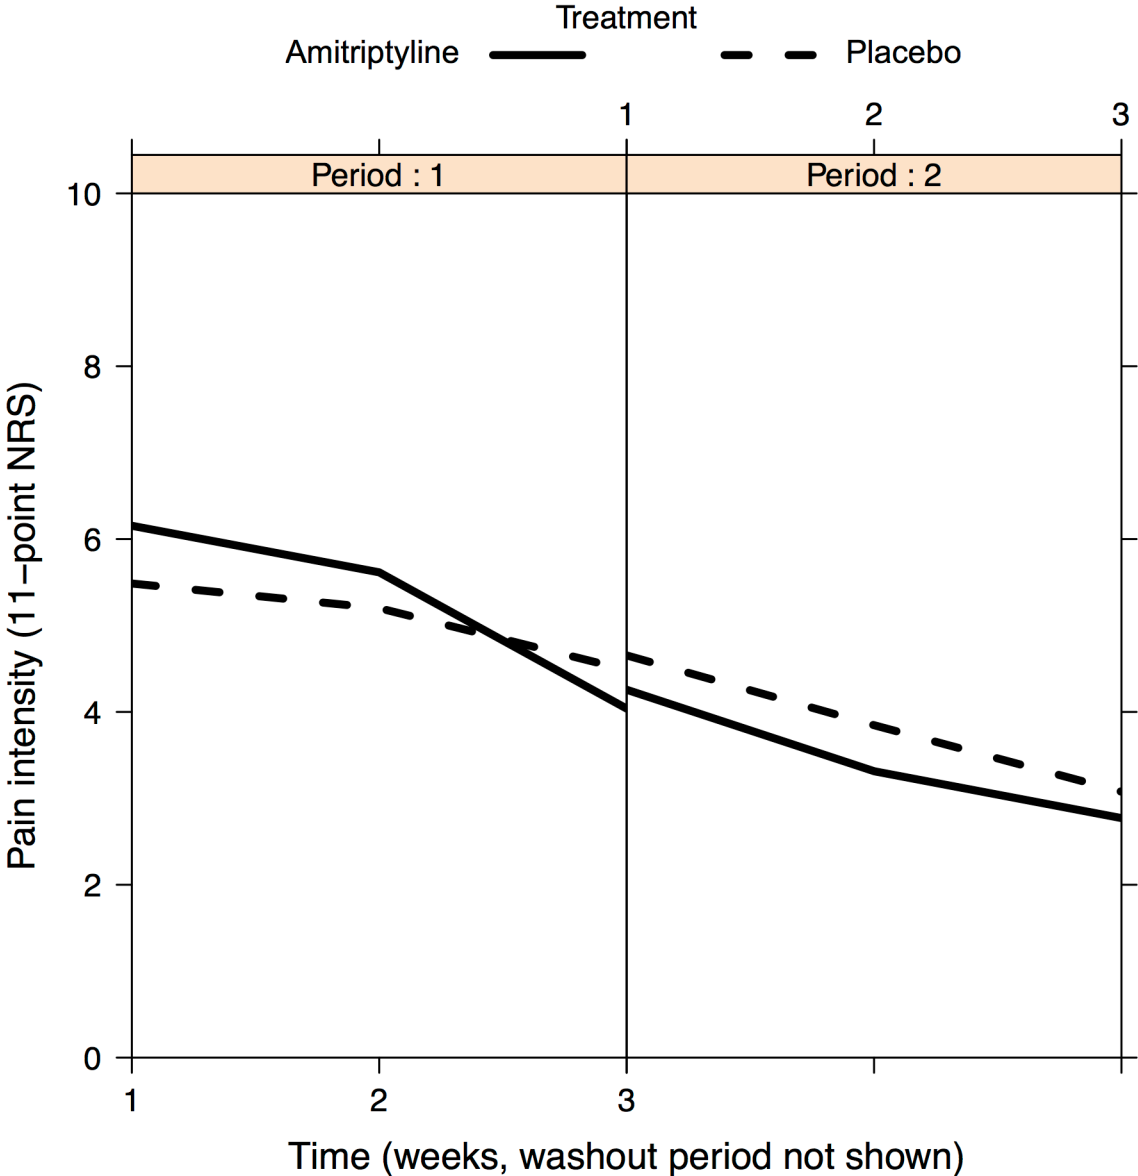

Supplement: pone.0126297.s006.pdf [file pone.0126297.s006.pdf]
