# Supplementary material for: Randomized, Double-Blind, Crossover Trial of Amitriptyline for Analgesia in Painful HIV-Associated Sensory Neuropathy
Source: PubMed Central journal article supplement (PMC4431817; doi:10.1371/journal.pone.0126297), 2015-05-14
Supplement: pone.0126297.s008.pdf [file pone.0126297.s008.pdf]

**S1 Table. ANOVA summary (intention-to-treat cohort, n=124)**

|                               | <b>df</b> | <b>F-value</b> | <b>p-value</b> |
|-------------------------------|-----------|----------------|----------------|
| <b>ARV-USER</b>               |           |                |                |
| <b>Between group</b>          |           |                |                |
| <i>Order</i> <sup>1</sup>     | 1, 60     | 0.04           | 0.85           |
| <b>Within group</b>           |           |                |                |
| <i>Period</i> <sup>2</sup>    | 1, 306    | 92.8           | < 0.001*       |
| <i>Time</i> <sup>3</sup>      | 2, 306    | 37.0           | < 0.001*       |
| <i>Treatment</i> <sup>4</sup> | 1, 306    | 2.4            | 0.13           |
| <b>ARV-NAIVE</b>              |           |                |                |
| <b>Between group</b>          |           |                |                |
| <i>Order</i> <sup>1</sup>     | 1, 60     | 0.02           | 0.89           |
| <b>Within group</b>           |           |                |                |
| <i>Period</i> <sup>2</sup>    | 1, 306    | 115.3          | < 0.001*       |
| <i>Time</i> <sup>3</sup>      | 2, 306    | 47.0           | < 0.001*       |
| <i>Treatment</i> <sup>4</sup> | 1, 306    | 0.59           | 0.44           |
| <b>ALL PARTICIPANTS</b>       |           |                |                |
| <b>Between group</b>          |           |                |                |
| <i>Order</i> <sup>1</sup>     | 1, 121    | 0.03           | 0.86           |
| <i>ARV</i> <sup>5</sup>       | 1, 121    | 3.61           | 0.06           |
| <b>Within group</b>           |           |                |                |
| <i>Period</i> <sup>2</sup>    | 1, 616    | 208.4          | < 0.001*       |
| <i>Time</i> <sup>3</sup>      | 2, 616    | 84.0           | < 0.001*       |
| <i>Treatment</i> <sup>4</sup> | 1, 616    | 2.74           | 0.1            |

<sup>1</sup> Order of treatment; <sup>2</sup> Period 1 vs. period 2; <sup>3</sup> Weeks; <sup>4</sup> Amitriptyline vs. placebo; <sup>5</sup> ARV-user vs. ARV-naïve; \* Statistically significance
