# Supplementary material for: Randomized, Double-Blind, Crossover Trial of Amitriptyline for Analgesia in Painful HIV-Associated Sensory Neuropathy
Source: PubMed Central journal article supplement (PMC4431817; doi:10.1371/journal.pone.0126297), 2015-05-14
Supplement: pone.0126297.s009.pdf [file pone.0126297.s009.pdf]

**S2 Table. ANOVA summary for period 1 comparison of amitriptyline and placebo-treated participants (per protocol cohort, n=122)**

|                               | <b>df</b> | <b>F-value</b> | <b>p-value</b> |
|-------------------------------|-----------|----------------|----------------|
| <b>Between group</b>          |           |                |                |
| <i>Treatment</i> <sup>1</sup> | 1, 120    | 0.63           | 0.43           |
| <b>Within group</b>           |           |                |                |
| <i>Time</i> <sup>2</sup>      | 2, 242    | 53.9           | < 0.001*       |

<sup>1</sup> Amitriptyline vs. placebo; <sup>2</sup> Weeks; \* Statistically significant
