# Supplementary material for: Randomized, Double-Blind, Crossover Trial of Amitriptyline for Analgesia in Painful HIV-Associated Sensory Neuropathy
Source: PubMed Central journal article supplement (PMC4431817; doi:10.1371/journal.pone.0126297), 2015-05-14
Supplement: pone.0126297.s010.pdf [file pone.0126297.s010.pdf]

**S3 Table. Adverse events during amitriptyline and placebo treatment (n=122)**

|                   | <b>Placebo</b> | <b>Amitriptyline</b> | <b>p-value*</b> |
|-------------------|----------------|----------------------|-----------------|
|                   | <b>[n (%)]</b> | <b>[n (%)]</b>       |                 |
| <b>Dry mouth</b>  | 1 (0.8)        | 9 (7.4)              | <0.01           |
| <b>Drowsiness</b> | 3 (2.5)        | 7 (5.7)              | 0.34            |
| <b>Chest Pain</b> | 1 (0.8)        | 0 (0)                | 1.00            |

\* McNemar's test
