# Supplementary material for: Randomized, Double-Blind, Crossover Trial of Amitriptyline for Analgesia in Painful HIV-Associated Sensory Neuropathy
Source: PubMed Central journal article supplement (PMC4431817; doi:10.1371/journal.pone.0126297), 2015-05-14
Supplement: pone.0126297.s011.pdf [file pone.0126297.s011.pdf]

**Table S4. Rescue medications (per protocol cohort, n = 122)**

|                                                                                     | <b>Placebo</b> | <b>Amitriptyline</b> | <b>p-value<sup>1</sup></b> |
|-------------------------------------------------------------------------------------|----------------|----------------------|----------------------------|
|                                                                                     | <b>[n (%)]</b> | <b>[n (%)]</b>       |                            |
| <b>Took rescue medication for pain in the last week of each intervention period</b> | 13 (10.7)      | 13 (10.7)            | 1.0                        |
| <b>Number pain medications listed on participants' drug inventories</b>             |                |                      |                            |
| 0                                                                                   | 19 (15.6)      | 21 (17.2)            |                            |
| 1                                                                                   | 83 (68.0)      | 81 (66.4)            |                            |
| 2                                                                                   | 20 (16.4)      | 20 (16.4)            |                            |
| <b>Analgesics and anti-inflammatories listed on participants' drug inventories</b>  |                |                      |                            |
| <i>Paracetamol</i>                                                                  | 78 (63.9)      | 78 (63.9)            | 1.0                        |
| <i>NSAID<sup>2</sup> or aspirin</i>                                                 | 32 (26.2)      | 25 (20.5)            | 0.35                       |
| <i>Paracetamol with codeine</i>                                                     | 7 (5.7)        | 10 (8.2)             | 0.18                       |
| <i>Paracetamol/aspirin/caffeine</i>                                                 | 6 (4.9)        | 8 (6.6)              | 0.32                       |

<sup>1</sup> p-values were obtained using McNemar's test for paired nominal data, which tests the null hypothesis of equal probabilities of rescue medication in the placebo and amitriptyline interventions respectively.

<sup>2</sup> Non-steroidal anti-inflammatory drugs
